# Supplementary material
Source: Springer Nature journal article supplement (https://www.springermedizin.de/resource/supplementary/12913_2007_639_MOESM2_ESM.pdf/9535860)
Supplement: MOESM2 [file 9535860]

| <b>Time line</b>                 | <b>DTP</b>                                                                        | <b>Control</b>                                                                      |
|----------------------------------|-----------------------------------------------------------------------------------|-------------------------------------------------------------------------------------|
| Randomisation                    |                                                                                   |                                                                                     |
| Baseline                         | 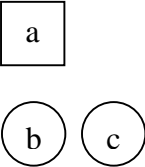 |  |
| During 9 months from<br>baseline |  |  |
| 9 months                         | Measurements of outcomes                                                          |                                                                                     |
